# Supplementary material for: Targeted therapies for previously treated advanced or metastatic renal cell carcinoma: systematic review and network meta-analysis
Source: PubMed Central journal article supplement (PMC6429896; doi:10.1136/bmjopen-2018-024691), 2019-03-01
Supplement: bmjopen-2018-024691supp001.pdf [file bmjopen-2018-024691supp001.pdf]

SUPPLEMENTARY FILE

Targeted therapies for previously treated advanced or metastatic renal cell carcinoma:  
systematic review and network meta-analysis

Contents

SEARCH STRATEGY ..... 2

DATA EXTRACTION ..... 4

RISK OF BIAS SUMMARIES ..... 7

DATASETS ..... 9

WINBUGS CODE ..... 12

RESULTS..... 14

REFERENCES ..... 15

SUPPLEMENTARY FILE

Targeted therapies for previously treated advanced or metastatic renal cell carcinoma:  
systematic review and network meta-analysis

# SEARCH STRATEGY

Table 1. Example search strategy (EMBASE update search for randomised controlled trials)

| OVID: EMBASE 1974 to July 03 (searched on 4 <sup>th</sup> July 2017 from Week 3 2016 to Week 27 2017) |                                                                                                                                                                                                                                                                                                                                                          |         |
|-------------------------------------------------------------------------------------------------------|----------------------------------------------------------------------------------------------------------------------------------------------------------------------------------------------------------------------------------------------------------------------------------------------------------------------------------------------------------|---------|
| #                                                                                                     | Search Terms                                                                                                                                                                                                                                                                                                                                             | Results |
| 1                                                                                                     | Carcinoma, Renal Cell/                                                                                                                                                                                                                                                                                                                                   | 20712   |
| 2                                                                                                     | (renal cell carcinoma\$ or cell renal carcinoma\$ or renal carcinoma\$ or kidney carcinoma\$ or kidney cell carcinoma\$ or renal adenocarcinoma\$ or kidney adenocarcinoma\$ or adenocarcinoma\$renal or adenocarcinoma\$kidney\$.mp.                                                                                                                    | 66950   |
| 3                                                                                                     | (hypernephroma\$ or nephroid carcinoma\$ or hypernephroid carcinoma\$ or kidney hypernephroma\$ or kidney pelvic carcinoma\$ or kidney pyelocarcinoma\$ or renal hypernephroma\$ or grawitz tumo?r\$ or renal cell neoplasm\$ or renal cell cancer\$ or renal tumo?r\$ or carcinoma chromophobe cell kidney\$ or chromophobe cell kidney carcinoma\$.mp. | 17922   |
| 4                                                                                                     | kidney neoplasms/                                                                                                                                                                                                                                                                                                                                        | 10255   |
| 5                                                                                                     | (cancer\$ adj2 kidney\$1).ti,ab.                                                                                                                                                                                                                                                                                                                         | 5836    |
| 6                                                                                                     | (neoplasm\$1 adj2 kidney\$1).ti,ab.                                                                                                                                                                                                                                                                                                                      | 329     |
| 7                                                                                                     | (neoplasm\$1 adj2 renal).ti,ab.                                                                                                                                                                                                                                                                                                                          | 2153    |
| 8                                                                                                     | (cancer\$ adj2 renal).ti,ab.                                                                                                                                                                                                                                                                                                                             | 12586   |
| 9                                                                                                     | (tumo?r\$1 adj2 kidney\$1).ti,ab.                                                                                                                                                                                                                                                                                                                        | 4838    |
| 10                                                                                                    | (tumo?r\$1 adj2 renal).ti,ab.                                                                                                                                                                                                                                                                                                                            | 14674   |
| 11                                                                                                    | or/1-10                                                                                                                                                                                                                                                                                                                                                  | 92199   |
| 12                                                                                                    | (axitinib or inlyta or AG013736 or "AG 013736").mp.                                                                                                                                                                                                                                                                                                      | 3492    |
| 13                                                                                                    | (sorafenib or nexavar or bay 43-9006 or bay 439006 or bay43-9006 or bay439006).mp.                                                                                                                                                                                                                                                                       | 23166   |
| 14                                                                                                    | (sunitinib or sutent or pha 2909040ad or pha2909040ad or "su 010398" or "su 011248" or su 10398 or su10398 or su 11248 or su010398 or su011248 or su11248).mp.                                                                                                                                                                                           | 18935   |
| 15                                                                                                    | (everolimus or afinitor or certican or zortress or nvp-rad-001 or rad-001 or rad 001a or rad001 or rad001a or sdz rad).mp.                                                                                                                                                                                                                               | 23010   |
| 16                                                                                                    | (nivolumab or opdivo or ONO4538 or ONO 4538 or BMS936558 or BMS 936558 or MDX1106 or MDX 1106).mp.                                                                                                                                                                                                                                                       | 4666    |
| 17                                                                                                    | (temsirolimus or cci-779 or cell-cycle-inhibitor-779 or nsc 683864 or nsc683864 or torisel).mp.                                                                                                                                                                                                                                                          | 7267    |
| 18                                                                                                    | (bevacizumab or avastin or nsc 704865 or nsc704865 or anti-vegf or rhumab-vegf).mp.                                                                                                                                                                                                                                                                      | 50865   |
| 19                                                                                                    | (armala or pazopanib or gw786034 or gw 786034 or sb 710468 or sb710468 or votrient).mp.                                                                                                                                                                                                                                                                  | 5612    |
| 20                                                                                                    | or/12-19                                                                                                                                                                                                                                                                                                                                                 | 99220   |
| 21                                                                                                    | Clinical trial/                                                                                                                                                                                                                                                                                                                                          | 934498  |
| 22                                                                                                    | Randomized controlled trial/                                                                                                                                                                                                                                                                                                                             | 460454  |
| 23                                                                                                    | Randomization/                                                                                                                                                                                                                                                                                                                                           | 74486   |
| 24                                                                                                    | Single blind procedure/                                                                                                                                                                                                                                                                                                                                  | 28210   |
| 25                                                                                                    | Double blind procedure/                                                                                                                                                                                                                                                                                                                                  | 140589  |
| 26                                                                                                    | Crossover procedure/                                                                                                                                                                                                                                                                                                                                     | 52369   |
| 27                                                                                                    | Placebo/                                                                                                                                                                                                                                                                                                                                                 | 309726  |
| 28                                                                                                    | Randomi?ed controlled trial\$.tw.                                                                                                                                                                                                                                                                                                                        | 162409  |
| 29                                                                                                    | Rct.tw.                                                                                                                                                                                                                                                                                                                                                  | 24817   |
| 30                                                                                                    | Random allocation.tw.                                                                                                                                                                                                                                                                                                                                    | 1704    |
| 31                                                                                                    | Randomly allocated.tw.                                                                                                                                                                                                                                                                                                                                   | 28013   |
| 32                                                                                                    | Allocated randomly.tw.                                                                                                                                                                                                                                                                                                                                   | 2271    |
| 33                                                                                                    | (allocated adj2 random).tw.                                                                                                                                                                                                                                                                                                                              | 867     |
| 34                                                                                                    | Single blind\$.tw.                                                                                                                                                                                                                                                                                                                                       | 19692   |
| 35                                                                                                    | Double blind\$.tw.                                                                                                                                                                                                                                                                                                                                       | 180274  |
| 36                                                                                                    | ((treble or triple) adj blind\$.tw.                                                                                                                                                                                                                                                                                                                      | 721     |
| 37                                                                                                    | Placebo\$.tw.                                                                                                                                                                                                                                                                                                                                            | 257991  |
| 38                                                                                                    | Prospective study/                                                                                                                                                                                                                                                                                                                                       | 388181  |

SUPPLEMENTARY FILE

Targeted therapies for previously treated advanced or metastatic renal cell carcinoma:  
systematic review and network meta-analysis

|    |                              |         |
|----|------------------------------|---------|
| 39 | or/21-38                     | 1782373 |
| 40 | Case study/                  | 48285   |
| 41 | Case report.tw.              | 342862  |
| 42 | Abstract report/ or letter/  | 1025233 |
| 43 | or/40-42                     | 1408381 |
| 44 | 39 not 43                    | 1736655 |
| 45 | 11 and 20 and 44             | 3942    |
| 46 | Animals/ not Humans/         | 1295518 |
| 47 | 45 not 46                    | 3942    |
| 48 | (editorial or letter).pt.    | 1521255 |
| 49 | 47 not 48                    | 3868    |
| 50 | limit 49 to em=201603-201727 | 327     |

Targeted therapies for previously treated advanced or metastatic renal cell carcinoma:  
systematic review and network meta-analysis

# DATA EXTRACTION

Table 2. Data extraction template

| Study or trial name:                                                             |               |             | Publication source        |
|----------------------------------------------------------------------------------|---------------|-------------|---------------------------|
| Full reference for all publications:                                             |               |             |                           |
| <b>Design</b>                                                                    |               |             |                           |
| Study design                                                                     |               |             |                           |
| Number of centres & Country/countries                                            |               |             |                           |
| Recruitment dates                                                                |               |             |                           |
| Length of follow-up [include study start date, data cut-off and completion date] |               |             |                           |
| Source of funding                                                                |               |             |                           |
| Eligibility criteria (inclusion and exclusion)                                   |               |             |                           |
| Participants and treatment arms                                                  | Intervention: | Comparator: | Publication, data cut-off |
| Intervention, method of delivery, dose and frequency                             |               |             |                           |
| Concomitant medication(s) or therapies                                           |               |             |                           |
| Cross-over or post-study interventions allowed                                   |               |             |                           |
| Number of patients (%)                                                           |               |             |                           |
| Number of cycles                                                                 |               |             |                           |
| At least one dose reduction n (%)                                                |               |             |                           |
| Treatment duration (and the data cut offs for each publication for the study)    |               |             |                           |
| Number randomised                                                                |               |             |                           |
| Number who received study medication                                             |               |             |                           |
| Number withdrawn/ discontinued and reasons [give breakdown]                      |               |             |                           |
| Disease stage and/or metastatic disease [give breakdown]                         |               |             |                           |
| Previous systemic therapy treatments, n (%) [give breakdown]                     |               |             |                           |
| Age, years: median (range)                                                       |               |             |                           |
| Ethnicity, n (%) [give breakdown]                                                |               |             |                           |
| Male, n (%)                                                                      |               |             |                           |
| Performance status n (%)                                                         |               |             |                           |

SUPPLEMENTARY FILE

Targeted therapies for previously treated advanced or metastatic renal cell carcinoma:  
systematic review and network meta-analysis

|                                                                                                            |                     |                   |                                  |
|------------------------------------------------------------------------------------------------------------|---------------------|-------------------|----------------------------------|
| [give tool and breakdown]                                                                                  |                     |                   |                                  |
| Reported subgroups                                                                                         | None reported       |                   |                                  |
| <b>Reported outcomes</b>                                                                                   |                     |                   |                                  |
| Primary outcome                                                                                            |                     |                   |                                  |
| Secondary outcomes                                                                                         |                     |                   |                                  |
| Outcomes and time points with data reported for subgroups of prior baseline therapies                      |                     |                   |                                  |
| Outcomes and time points with data reported for subgroups of baseline prognostic scores (e.g. ECOG, MSKCC) |                     |                   |                                  |
| <b>Results</b>                                                                                             | <b>Intervention</b> | <b>Comparator</b> | <b>Publication, data cut-off</b> |
| <b>PFS</b>                                                                                                 |                     |                   |                                  |
| HR (95% CI)                                                                                                |                     |                   |                                  |
| HR (95% CI) for subgroups based on prior therapy:                                                          |                     |                   |                                  |
| PFS, median (95% CI) months                                                                                |                     |                   |                                  |
| PFS, median (95% CI), months for subgroups based on prior therapy                                          |                     |                   |                                  |
| Number of progression events n (%)                                                                         |                     |                   |                                  |
| <b>Overall survival</b>                                                                                    |                     |                   |                                  |
| HR, (95% CI)                                                                                               |                     |                   |                                  |
| HR, (95% CI) for subgroups based on prior therapy                                                          |                     |                   |                                  |
| Number of deaths, n (%)                                                                                    |                     |                   |                                  |
| Median OS, months (95% CI)                                                                                 |                     |                   |                                  |
| Median OS, (95% CI) months for subgroup based on prior therapy                                             |                     |                   |                                  |
| Number of deaths, n (%) for subgroups based on prior therapy                                               |                     |                   |                                  |
| <b>Response</b>                                                                                            |                     |                   |                                  |
| Objective response, n (%)                                                                                  |                     |                   |                                  |
| Complete response, n (%)                                                                                   |                     |                   |                                  |
| Partial response, n (%)                                                                                    |                     |                   |                                  |
| Stable disease, n (%)                                                                                      |                     |                   |                                  |
| Progressive disease, n (%)                                                                                 |                     |                   |                                  |
| Time to response, months (median [range])                                                                  |                     |                   |                                  |
| Duration of response, median (95% CI), months                                                              |                     |                   |                                  |
| Other measures of response                                                                                 |                     |                   |                                  |
| <b>HRQoL</b>                                                                                               |                     |                   |                                  |

SUPPLEMENTARY FILE

Targeted therapies for previously treated advanced or metastatic renal cell carcinoma:  
systematic review and network meta-analysis

|                                                                                |                        |                 |  |
|--------------------------------------------------------------------------------|------------------------|-----------------|--|
| [Scale 1] Mean end of treatment                                                |                        |                 |  |
| [Scale 1] Mean difference (95% CI)                                             |                        |                 |  |
| Completion rate                                                                |                        |                 |  |
| <b>Adverse events (AE's)</b>                                                   |                        |                 |  |
| N in safety analysis                                                           |                        |                 |  |
| Total AE's (any Grade)                                                         |                        |                 |  |
| Total AE's Grade ≥3                                                            |                        |                 |  |
| [enter list of individual AEs]                                                 |                        |                 |  |
| <b>Risk of bias assessment based (RCTs)</b>                                    |                        |                 |  |
| <b>Domain</b>                                                                  | <b>Risk assessment</b> | <b>Comments</b> |  |
| Random sequence generation                                                     | [Low/High/Unclear]     |                 |  |
| Allocation concealment                                                         | [Low/High/Unclear]     |                 |  |
| Blinding (who [participants, personnel], and method)                           | [Low/High/Unclear]     |                 |  |
| Other biases                                                                   | [Low/High/Unclear]     |                 |  |
| <i>Progression-free survival</i>                                               |                        |                 |  |
| -Blinding of outcome assessment                                                | [Low/High/Unclear]     |                 |  |
| -Incomplete outcome data                                                       | [Low/High/Unclear]     |                 |  |
| -Selective reporting                                                           | [Low/High/Unclear]     |                 |  |
| <i>Overall survival</i>                                                        |                        |                 |  |
| -Blinding of outcome assessment                                                | [Low/High/Unclear]     |                 |  |
| -Incomplete outcome data                                                       | [Low/High/Unclear]     |                 |  |
| -Selective reporting                                                           | [Low/High/Unclear]     |                 |  |
| <i>Response (partial response, disease stabilisation, progressive disease)</i> |                        |                 |  |
| -Blinding of outcome assessment                                                | [Low/High/Unclear]     |                 |  |
| -Incomplete outcome data                                                       | [Low/High/Unclear]     |                 |  |
| -Selective reporting                                                           | [Low/High/Unclear]     |                 |  |
| <i>HRQoL</i>                                                                   |                        |                 |  |
| -Blinding of outcome assessment                                                | [Low/High/Unclear]     |                 |  |
| -Incomplete outcome data                                                       | [Low/High/Unclear]     |                 |  |
| -Selective reporting                                                           | [Low/High/Unclear]     |                 |  |
| <i>Adverse events</i>                                                          |                        |                 |  |
| -Blinding of outcome assessment                                                | [Low/High/Unclear]     |                 |  |
| -Incomplete outcome data                                                       | [Low/High/Unclear]     |                 |  |
| -Selective reporting                                                           | [Low/High/Unclear]     |                 |  |

Targeted therapies for previously treated advanced or metastatic renal cell carcinoma:  
systematic review and network meta-analysis

# RISK OF BIAS SUMMARIES

Table 3. Summary of Cochrane risk of bias assessment for randomised control trials

| Criteria                                                                                                                                                                                                                               |                                 | AXIS | Checkmate<br>-025 | HOPE 205 | METEOR | RECORD-1 |
|----------------------------------------------------------------------------------------------------------------------------------------------------------------------------------------------------------------------------------------|---------------------------------|------|-------------------|----------|--------|----------|
| All outcomes                                                                                                                                                                                                                           | Random sequence generation      | ✓    | ✓                 | ✓        | ✓      | ✓        |
|                                                                                                                                                                                                                                        | Allocation concealment          | ✓    | ✓                 | ✓        | ✓      | ✓        |
|                                                                                                                                                                                                                                        | Blinding: participant/personnel | ✗    | ✗                 | ✗        | ✗      | ✓        |
| <b>Outcome-specific</b>                                                                                                                                                                                                                |                                 |      |                   |          |        |          |
| OS                                                                                                                                                                                                                                     | Blinding: outcome assessment    | ✓    | ✓                 | ✓        | ✓      | ✓        |
|                                                                                                                                                                                                                                        | Incomplete outcome data         | ✓    | ?                 | ✓        | ?      | ✓        |
|                                                                                                                                                                                                                                        | Selective Reporting             | ✓    | ✓                 | ✓        | ✓      | ✓        |
|                                                                                                                                                                                                                                        | Other Biases                    | ?    | ?                 | ?        | ?      | ?        |
| PFS                                                                                                                                                                                                                                    | Blinding: outcome assessment    | ✓    | ✗                 | ✓        | ✓      | ✓        |
|                                                                                                                                                                                                                                        | Incomplete outcome data         | ✓    | ✓                 | ✓        | ?      | ✓        |
|                                                                                                                                                                                                                                        | Selective Reporting             | ✓    | ✓                 | ✓        | ✓      | ✓        |
|                                                                                                                                                                                                                                        | Other Biases                    | NA   | NA                | ?        | NA     | NA       |
| ORR                                                                                                                                                                                                                                    | Blinding: outcome assessment    | ✓    | ✗                 | ✓        | ✓      | ✓        |
|                                                                                                                                                                                                                                        | Incomplete outcome data         | ?    | ✓                 | ✓        | ?      | ✓        |
|                                                                                                                                                                                                                                        | Selective Reporting             | ✓    | ✓                 | ✓        | ✓      | ?        |
|                                                                                                                                                                                                                                        | Other Biases                    | NA   | NA                | ?        | NA     | NA       |
| HRQoL                                                                                                                                                                                                                                  | Blinding: outcome assessment    | ✗    | ✗                 | NA       | ✗      | ✗        |
|                                                                                                                                                                                                                                        | Incomplete outcome data         | ✓    | ✓                 | NA       | ?      | ✓        |
|                                                                                                                                                                                                                                        | Selective Reporting             | ✓    | ✓                 | NA       | ✓      | ✗        |
|                                                                                                                                                                                                                                        | Other Biases                    | NA   | NA                | NA       | NA     | NA       |
| AE                                                                                                                                                                                                                                     | Blinding: outcome assessment    | ✗    | ✗                 | ✗        | ✗      | ✓        |
|                                                                                                                                                                                                                                        | Incomplete outcome data         | ✓    | ✓                 | ✓        | ✓      | ✓        |
|                                                                                                                                                                                                                                        | Selective Reporting             | ✓    | ✓                 | ✓        | ✓      | ✓        |
|                                                                                                                                                                                                                                        | Other Biases                    | NA   | NA                | ?        | NA     | NA       |
| Key: ✓, low risk; ?, unclear risk; ✗, high risk; NA, not applicable.<br>Abbreviations: OS, overall survival; PFS, progression-free survival; ORR, objective response rate; HRQoL, health-related quality of life; AE, adverse effects. |                                 |      |                   |          |        |          |

SUPPLEMENTARY FILE

Targeted therapies for previously treated advanced or metastatic renal cell carcinoma:  
systematic review and network meta-analysis

Table 4. Summary of ROBINS-I risk of bias assessments in non-randomised studies

|                                                                                                   | Guida<br>2017 | Heng<br>2016 | Iacovelli<br>2015 | Lakomy<br>2017 | SPAZO-2 | Vogelzang<br>2016 | Wong<br>2014 |
|---------------------------------------------------------------------------------------------------|---------------|--------------|-------------------|----------------|---------|-------------------|--------------|
| <b>Overall survival</b>                                                                           |               |              |                   |                |         |                   |              |
| Confounding                                                                                       | ~             | ~            | x                 | x              | ~       | ~                 | ~            |
| Selection                                                                                         | ✓             | ✓            | ✓                 | ✓              | ✓       | ✓                 | ✓            |
| Intervention<br>classification                                                                    | ✓             | ✓            | ✓                 | ✓              | ✓       | ✓                 | ✓            |
| Intervention<br>deviations                                                                        | ✓             | ✓            | ✓                 | ✓              | ✓       | ✓                 | ✓            |
| Missing data                                                                                      | ✓             | NI           | ✓                 | ✓              | ✓       | ✓                 | x            |
| Outcome<br>measures                                                                               | ✓             | ✓            | ✓                 | ✓              | ✓       | ✓                 | ✓            |
| Outcome reporting                                                                                 | ✓             | ✓            | ✓                 | ✓              | ✓       | ✓                 | ✓            |
| <b>Overall<br/>judgement</b>                                                                      | x             | ~            | x                 | x              | ~       | ~                 | x            |
| <b>Progression-free survival</b>                                                                  |               |              |                   |                |         |                   |              |
| Confounding                                                                                       | x             | ~            | -                 | x              | ~       | ~                 | ~            |
| Selection                                                                                         | ✓             | ✓            | -                 | ✓              | ✓       | ✓                 | ✓            |
| Intervention<br>classification                                                                    | ✓             | ✓            | -                 | ✓              | ✓       | ✓                 | ✓            |
| Intervention<br>deviations                                                                        | ✓             | ✓            | -                 | ✓              | ✓       | ✓                 | ✓            |
| Missing data                                                                                      | ✓             | NI           | -                 | ✓              | ✓       | ✓                 | x            |
| Outcome<br>measures                                                                               | x             | x            | -                 | x              | x       | x                 | x            |
| Outcome reporting                                                                                 | x             | x            | -                 | x              | x       | x                 | x            |
| <b>Overall<br/>judgement</b>                                                                      | x             | x            | -                 | x              | x       | x                 | x            |
| Abbreviations: PFS = progression-free survival; OS = overall survival                             |               |              |                   |                |         |                   |              |
| <b>Key:</b> ✓, low risk; ~, moderate risk; x, serious risk; x, critical risk; NI, no information. |               |              |                   |                |         |                   |              |



Targeted therapies for previously treated advanced or metastatic renal cell carcinoma:  
systematic review and network meta-analysis

# DATASETS

Table 5. Study data: overall survival

| Study                            | Data details                  | T1       | T2       | HR (95% CI)                | T1 median months (95% CI)  | T2 median (95% CI)         |
|----------------------------------|-------------------------------|----------|----------|----------------------------|----------------------------|----------------------------|
| <b>AXIS<sup>1</sup></b>          | <b>Prior sunitinib subset</b> | <b>5</b> | <b>6</b> | <b>1.00 (0.78 to 1.27)</b> | <b>NR</b>                  | <b>NR</b>                  |
| <b>CheckMate 025<sup>2</sup></b> | -                             | <b>3</b> | <b>1</b> | <b>0.73 (0.57 to 0.93)</b> | <b>25.0 (21.8 to NE)</b>   | <b>19.6 (17.6 to 23.1)</b> |
| <b>HOPE 205<sup>3</sup></b>      | <b>July 2015 cutoff</b>       | <b>7</b> | <b>1</b> | <b>0.59 (0.36 to 0.97)</b> | <b>25.5 (16.4 to 32.1)</b> | <b>15.4 (11.8 to 20.6)</b> |
| <b>METEOR<sup>4</sup></b>        | <b>31 Dec 2015 cutoff</b>     | <b>2</b> | <b>1</b> | <b>0.66 (0.53 to 0.83)</b> | <b>21.4 (18.7 to NE)</b>   | <b>16.5 (14.7 to 18.8)</b> |
| <b>RECORD-1<sup>5</sup></b>      | <b>RPSFT adjusted</b>         | <b>1</b> | <b>4</b> | <b>0.60 (0.22 to 1.65)</b> | <b>14.4 (NR)</b>           | <b>10.0 (NR)</b>           |
| Guida 2017 <sup>6*</sup>         |                               | 5        | 1        | 1.33 (0.8 to 2.1)          | 14.9 (7.4 to 22.4)         | 21.5 (16.5 to 26.5)        |
| Heng 2016 <sup>7</sup>           | -                             | 6        | 1        | 1.25 (0.75 to 2.10)        | 18.7 (NR)                  | 23.0 (NR)                  |
| Heng 2016 <sup>7</sup>           | -                             | 5        | 1        | 1.22 (0.77 to 1.94)        | 23.5 (NR)                  | 23.0 (NR)                  |
| Iacovelli 2015 <sup>8</sup>      | -                             | 6        | 1        | 2.21 (1.47 to 3.31)        | NR                         | NR                         |
| SPAZO-2 <sup>9</sup>             | Adjusted results              | 5        | 1        | 0.81 (0.60 to 1.20)        | 11.6 (7 to 16)             | 9.5 (7 to 12)              |
| Vogelzang 2016 <sup>10</sup>     | -                             | 1        | 5        | 1.16 (0.74 to 1.82)        | NR                         | NR                         |
| Wong 2014 <sup>11</sup>          | Full adjusted results         | 1        | 6        | 0.66 (0.44 to 0.99)        | 19.0 (NR)                  | 13.8 (NR)                  |

Abbreviations: T1, treatment 1; T2, treatment 2 (baseline); HR, hazard ratio; CI, confidence interval; NE, not estimable; RPSFT, rank preserving structural failure time model; NR, not reported.  
Treatment codes: 1, everolimus; 2, cabozantinib; 3, nivolumab; 4, best supportive care/placebo; 5, axitinib; 6, sorafenib; 7, lenvatinib with everolimus. Studies in bold formed the primary analysis.  
\*Data from personal communication with the study author, 11 March 2018

Table 6. Study data: progression-free survival

| Study                        | Data details               | T1       | T2       | HR (95% CI)                | T1 median months (95% CI) | T2 median (95% CI)      |
|------------------------------|----------------------------|----------|----------|----------------------------|---------------------------|-------------------------|
| <b>HOPE 205<sup>12</sup></b> | <b>IRR</b>                 | <b>7</b> | <b>1</b> | <b>0.45 (0.27 to 0.79)</b> | <b>12.8 (7.4 to 17.5)</b> | <b>5.6 (3.6 to 9.3)</b> |
| <b>METEOR<sup>4</sup></b>    | <b>IRR for ITT</b>         | <b>2</b> | <b>1</b> | <b>0.51 (0.41 to 0.62)</b> | <b>7.4 (6.6 to 9.1)</b>   | <b>3.9 (3.7 to 5.1)</b> |
| <b>RECORD-1<sup>13</sup></b> | <b>Final analysis, ICR</b> | <b>1</b> | <b>4</b> | <b>0.33 (0.25 to 0.43)</b> | <b>4.9 (4.0 to 5.5)</b>   | <b>1.9 (1.8 to 1.9)</b> |
| AXIS <sup>1</sup>            | Prior sunitinib subset     | 5        | 6        | 0.72 (0.57 to 0.90)        | 6.5 (5.7 to 7.9)          | 4.4 (2.9 to 4.7)        |
| Guida 2017 <sup>6*</sup>     |                            | 5        | 1        | 0.84 (0.55 to 1.2)         | 7.7 (5.3 to 10.2)         | 5.3 (4.0 to 6.6)        |
| Heng 2016 <sup>7</sup>       | -                          | 6        | 1        | 1.47 (0.95 to 2.28)        | -                         | -                       |
| Heng 2016 <sup>7</sup>       | -                          | 5        | 1        | 1.26 (0.81 to 1.95)        | -                         | -                       |
| Iacovelli 2015 <sup>8</sup>  | -                          | 6        | 1        | NR                         | NR                        | NR                      |
| SPAZO-2 <sup>9</sup>         | Adjusted results           | 5        | 1        | 0.76 (0.5 to 1.1)          | 5.3 (3 to 7)              | 4.6 (3 to 6)            |

SUPPLEMENTARY FILE

Targeted therapies for previously treated advanced or metastatic renal cell carcinoma:  
systematic review and network meta-analysis

|                                                                                                                                                                                                                                                                                                                                                                                                              |                  |   |   |                     |           |          |
|--------------------------------------------------------------------------------------------------------------------------------------------------------------------------------------------------------------------------------------------------------------------------------------------------------------------------------------------------------------------------------------------------------------|------------------|---|---|---------------------|-----------|----------|
| Vogelzang 2016 <sup>10</sup>                                                                                                                                                                                                                                                                                                                                                                                 | Adjusted results | 1 | 5 | 1.16 (0.85 to 1.59) | NR        | NR       |
| Wong 2014 <sup>11</sup>                                                                                                                                                                                                                                                                                                                                                                                      | Adjusted results | 1 | 6 | 0.76 (0.55 to 1.04) | 10.1 (NR) | 8.6 (NR) |
| Abbreviations: T1, treatment 1; T2, treatment 2 (baseline); HR, hazard ratio; CI, confidence interval; NR, not reported.<br>Treatment codes: 1, everolimus; 2, cabozantinib; 3, nivolumab; 4, best supportive care/placebo; 5, axitinib; 6, sorafenib; 7, lenvatinib with everolimus. Studies in bold formed the primary analysis.<br>*Data from personal communication with the study author, 11 March 2018 |                  |   |   |                     |           |          |

Table 7. Study data: objective response rate

| Study                                                                                                                                                                                                                   | N  |    | Objective response |     |     |    |
|-------------------------------------------------------------------------------------------------------------------------------------------------------------------------------------------------------------------------|----|----|--------------------|-----|-----|----|
|                                                                                                                                                                                                                         | T1 | T2 | T1                 | T2  | T1  | T2 |
| AXIS <sup>14</sup>                                                                                                                                                                                                      | 5  | 6  | 361                | 362 | 70  | 34 |
| CheckMate 025 <sup>2</sup>                                                                                                                                                                                              | 3  | 1  | 410                | 411 | 103 | 22 |
| HOPE 205 <sup>12</sup>                                                                                                                                                                                                  | 7  | 1  | 51                 | 50  | 18  | 0  |
| METEOR <sup>4</sup>                                                                                                                                                                                                     | 2  | 1  | 330                | 328 | 57  | 11 |
| RECORD-1 <sup>13</sup>                                                                                                                                                                                                  | 1  | 4  | 277                | 139 | 5   | 0  |
| Abbreviations: T1, treatment 1; T2, treatment 2 (baseline).<br>Treatment codes: 1, everolimus; 2, cabozantinib; 3, nivolumab; 4, best supportive care/placebo; 5, axitinib; 6, sorafenib; 7, lenvatinib with everolimus |    |    |                    |     |     |    |

Table 8. Study data: grade 3 or 4 adverse events

| Study                                                                                                                                                                                                                                                                                                                                                         | N  |    | Grade 3 or 4 adverse events |     |     |     |
|---------------------------------------------------------------------------------------------------------------------------------------------------------------------------------------------------------------------------------------------------------------------------------------------------------------------------------------------------------------|----|----|-----------------------------|-----|-----|-----|
|                                                                                                                                                                                                                                                                                                                                                               | T1 | T2 | T1                          | T2  | T1  | T2  |
| AXIS <sup>1</sup>                                                                                                                                                                                                                                                                                                                                             | 5  | 6  | 359                         | 355 | NR  | NR  |
| CheckMate 025 <sup>2</sup>                                                                                                                                                                                                                                                                                                                                    | 3  | 1  | 406                         | 397 | 76  | 145 |
| HOPE 205 <sup>15</sup>                                                                                                                                                                                                                                                                                                                                        | 7  | 1  | 51                          | 50  | 36  | 25  |
| METEOR <sup>4</sup>                                                                                                                                                                                                                                                                                                                                           | 2  | 1  | 331                         | 322 | 235 | 193 |
| RECORD-1 <sup>13</sup>                                                                                                                                                                                                                                                                                                                                        | 1  | 4  | 274                         | 137 | NR  | NR  |
| Abbreviations: T1, treatment 1; T2, treatment 2 (baseline); HR, hazard ratio; CI, confidence interval; NE, not estimable; RPSFT, rank preserving structural failure time model; NR, not reported.<br>Treatment codes: 1, everolimus; 2, cabozantinib; 3, nivolumab; 4, best supportive care/placebo; 5, axitinib; 6, sorafenib; 7, lenvatinib with everolimus |    |    |                             |     |     |     |

Table 9. Study data: health-related quality of life (not meta-analysed)

| Study              | T1 | T2 | Study analysis details       | FKSI scales                                                                         | EuroQoI scales                                                                    | EORTC QLQ-C30 |
|--------------------|----|----|------------------------------|-------------------------------------------------------------------------------------|-----------------------------------------------------------------------------------|---------------|
| AXIS <sup>16</sup> | 5  | 6  | End of treatment MD (95% CI) | DRS: MD 0.12 (-0.45 to 0.69) p = 0.68;<br>FKSI-15: MD 0.35 (-0.63 to 1.34) p = 0.48 | 5D Index: MD 0.02 (-0.01 to 0.05) p = 0.19<br>VAS: -0.53 (-2.77 to 1.72) p = 0.65 | NR            |

SUPPLEMENTARY FILE

Targeted therapies for previously treated advanced or metastatic renal cell carcinoma:  
systematic review and network meta-analysis

|                                                                                                                                                                                                                                                                                                                                                                                                                                                                       |   |   |                                                           |                                              |    |                                                                                                                |
|-----------------------------------------------------------------------------------------------------------------------------------------------------------------------------------------------------------------------------------------------------------------------------------------------------------------------------------------------------------------------------------------------------------------------------------------------------------------------|---|---|-----------------------------------------------------------|----------------------------------------------|----|----------------------------------------------------------------------------------------------------------------|
| CheckMate 025 <sup>2</sup>                                                                                                                                                                                                                                                                                                                                                                                                                                            | 3 | 1 | Median change (range) at week 104                         | DRS: niv -2 (-1 to 16)<br>evo 2 (-7 to 15)   | NR | NR                                                                                                             |
| HOPE 205                                                                                                                                                                                                                                                                                                                                                                                                                                                              | 7 | 1 | NA                                                        | NR                                           | NR | NR                                                                                                             |
| METEOR                                                                                                                                                                                                                                                                                                                                                                                                                                                                | 2 | 1 | NA                                                        | NR                                           | NR | NR                                                                                                             |
| RECORD-1 <sup>17</sup>                                                                                                                                                                                                                                                                                                                                                                                                                                                | 1 | 4 | Time to deterioration HR (95% CI); results favour placebo | DRS: HR 0.82, 95% CI 0.75 to 0.92, p = 0.001 | NR | Global health status HR 0.85 (0.75 to 0.96) p = 0.006<br>Physical functioning HR 0.84 (0.75 to 0.94) p = 0.001 |
| Abbreviations: FKSI-DRS = Functional Assessment of Cancer Therapy (FACT) Kidney Cancer Symptom Index; DRS = Disease-related Symptoms subscale of the FKSI-15; EQ-5D = European Quality of Life self-report questionnaire; VAS = visual analogue scale; EORTC QLQ = European Organization for the Research and Treatment of Cancer Quality of Life Questionnaire; MD, mean difference; CI, confidence interval; HR, hazard ratio; NA, not applicable; NR, not reported |   |   |                                                           |                                              |    |                                                                                                                |

Targeted therapies for previously treated advanced or metastatic renal cell carcinoma:  
systematic review and network meta-analysis

## WINBUGS CODE

### CODE 1: Fixed effect log hazard ratio NMA for 2-arm studies (overall survival primary and progression-free survival primary)

```

model{
#Model for log-hazard ratios
for(i in 1:ndp){
    prec[i]<- 1/(se[i]*se[i])
    lhr[i]~dnorm(md[i],prec[i])

#Fixed effect model for log hazard ratios
    md[i] <- d[t[i]] - d[b[i]]

#Deviance residuals for data i
    dev[i] <- (lhr[i] - md[i])*(lhr[i] - md[i])/(se[i]*se[i])
    }
    resdev <- sum(dev[])

#Give priors for log hazard ratios
    d[1]<-0
    for (k in 2:nt){
        d[k] ~ dnorm(0,.001)
    }

#Rank the treatment effects (with 1=best) & record the best treatment
for(k in 1:nt){
    rk[k]<- rank(d[],k)
    best[k]<-equals(rk[k],1)
    }

#All pairwise log hazard ratios and hazard ratios
for (c in 1:nt-1){
    for (k in (c+1):nt){
        lhr[c,k] <- d[k] - d[c]
        HR[c,k] <- exp(lhr[c,k])
    }
}
}

```

### CODE 2: Fixed effect odds ratio NMA (objective response rate analysis)

```

model{
for(i in 1:ns){

    delta[i,t[i,1]]<-0
    mu[i] ~ dnorm(0,.0001)

    for (k in 1:na[i]) {
        r[i,t[i,k]] ~ dbin(p[i,t[i,k]],n[i,t[i,k]])
    }
}
}

```

SUPPLEMENTARY FILE

Targeted therapies for previously treated advanced or metastatic renal cell carcinoma:  
systematic review and network meta-analysis

```

logit(p[i,t[i,k]])<-mu[i] + delta[i,t[i,k]]

rhat[i,t[i,k]]<- p[i,t[i,k]] * n[i,t[i,k]]

resdev[i,k]<- 2 * (r[i,t[i,k]] * (log(r[i,t[i,k]]) - log(rhat[i,t[i,k]])) + (n[i,t[i,k]] - r[i,t[i,k]]) * (log(n[i,t[i,k]] - r[i,t[i,k]]) - log(n[i,t[i,k]] - rhat[i,t[i,k]])))
}
sumdev[i]<-sum(resdev[i,1:na[i]])

for (k in 2:na[i]) {
  delta[i,t[i,k]] <- d[t[i,k]] - d[t[i,1]]      # trial-specific LOR
}
}

sumdevtot<- sum(sumdev[])

d[1]<-0
for (k in 2:nt){
  d[k] ~ dnorm(0,.0001)
}

for (i in 1:ns) {
  mu1[i] <- mu[i] * equals(t[i,1],1)
}

for (k in 1:nt) {
  logit(T[k])<- sum(mu1[])/nb +d[k]
}

for (k in 1:nt) {
  rk[k]<-nt - rank(T[],k)
  best[k]<-equals(rk[k],1)
}

for (c in 1:(nt-1)) {
  for (k in (c+1):nt) {
    lor[c,k] <- (d[k] - d[c])
    or[c,k]<-exp(lor[c,k])
  }
}
}

```

CODE 3: Fixed effect log hazard ratio NMA to combine 2-arm and multi-arm studies (overall survival sensitivity and progression-free survival sensitivity)

model{

# Priors

#On tx effect mean

beta[1] < -0

for (tt in 2:nt){

beta[tt]~dnorm(0,1.0E-6)

}

#On individual study baseline effect

SUPPLEMENTARY FILE

Targeted therapies for previously treated advanced or metastatic renal cell carcinoma:  
systematic review and network meta-analysis

```

for(ss in 1:ns){
  alpha[ss] ~ dnorm(0,1.0E-6)
}

# Fit data
for(ii in 1:ndp){
  mu[ii] <- alpha[t[ii]]*multi[ii] + beta[tx[ii]] - beta[b[ii]]
  prec[ii] <- 1/pow(se[ii],2)
  m[ii] ~ dnorm(mu[ii],prec[ii])
}

# Calculate HRs
for (hh in 1:nt) {
  hr[hh] <- -exp(beta[hh])
}

# Rank
for (ll in 1:nt) {
  rk[ll] <- -rank(beta[,ll])
  best[ll] <- equals(rk[ll],1)
}
}

```

## RESULTS

Table 10. Results of the RCT network meta-analyses for objective response rate, with 0.5 correction of 0 values

|                         | Best supportive care | Lenvatinib+ everolimus | Nivolumab             | Cabozantinib          | Everolimus          |
|-------------------------|----------------------|------------------------|-----------------------|-----------------------|---------------------|
| Everolimus              | 0.24 (0.00 to 1.39)  | 91190 (9.30 to 34400)  | 6.23 (3.78 to 10.01)  | 6.61 (3.27 to 12.55)  | -                   |
| Cabozantinib            | 0.04 (0.00 to 0.24)  | 14500 (1.36 to 5629)   | 1.06 (0.41 to 2.19)   | -                     | 0.15 (0.08 to 0.31) |
| Nivolumab               | 0.00 (0.00 to 0.24)  | 7.73 (1.46 to 5652)    | -                     | 0.94 (0.46 to 2.41)   | 0.16 (0.10 to 0.26) |
| Lenvatinib + everolimus | 0.01 (0.00 to 0.04)  | -                      | 0.13 (0.00 to 0.68)   | 0.00 (0.00 to 0.74)   | 0.00 (0.00 to 0.11) |
| BSC                     | -                    | 193 (24.99 to 4494382) | 657000 (4.15 to 9580) | 23.53 (4.10 to 30312) | 4.02 (0.72 to 4826) |

Abbreviations: BSC, best supportive care; OS, overall survival; PFS, progression-free survival  
Results are odds ratios with 95% credible interval; odds ratios > 1 favour the treatment along the top row.

Targeted therapies for previously treated advanced or metastatic renal cell carcinoma:  
systematic review and network meta-analysis

## REFERENCES

1. Motzer RJ, Escudier B, Tomczak P, Hutson TE, Michaelson MD, Negrier S, et al. Axitinib versus sorafenib as second-line treatment for advanced renal cell carcinoma: overall survival analysis and updated results from a randomised phase 3 trial, 2013. Available from: <http://onlinelibrary.wiley.com/o/cochrane/clcentral/articles/055/CN-00864055/frame.html>. Date accessed.
2. Motzer RJ, Escudier B, McDermott DF, George S, Hammers HJ, Srinivas S, et al. Nivolumab versus Everolimus in Advanced Renal-Cell Carcinoma, 2015. Available from: <http://onlinelibrary.wiley.com/o/cochrane/clcentral/articles/537/CN-01108537/frame.html>. Date accessed.
3. Hutson TE, Dutcus CE, Ren M, Baig MA, Fishman MN. Subgroup analyses and updated overall survival from the phase II trial of lenvatinib (LEN), everolimus (EVE), and LEN+EVE in metastatic renal cell carcinoma (mRCC). *Journal of Clinical Oncology Conference 2016*; 34.
4. Choueiri T, Escudier B, Powles T, Tannir N, Mainwaring P, Rin iB. Cabozantinib versus everolimus in advanced renal cell carcinoma (METEOR): final results from a randomised, open-label, phase 3 trial. *The Lancet Oncology* 2016; 17: 917-27.
5. Korhonen P, Zuber E, Branson M, al. e. Correcting overall survival for the impact of crossover via a rank-preserving structural failure time (RPSFT) model in the RECORD-1 trial of everolimus in metastatic renal-cell carcinoma. *J Biopharm Stat* 2012; 22: 1258-71.
6. Guida A, Albiges L, Derosa L, Loriot Y, Massard C, Fizazi K, et al. Everolimus Versus Axitinib as Second-line Therapy in Metastatic Renal Cell Carcinoma: Experience From Institut Gustave Roussy. *Clinical Genitourinary Cancer* 2017; 15: e1081-e8.
7. Heng DY, Signorovitch J, Swallow E, Li N, Zhong Y, Qin P, et al. Comparative Effectiveness of Second-Line Targeted Therapies for Metastatic Renal Cell Carcinoma: A Systematic Review and Meta-Analysis of Real-World Observational Studies. *PLoS ONE [Electronic Resource]* 2014; 9: e114264.
8. Iacovelli R, Santini D, Rizzo M, Felici A, Santoni M, Verzoni E, et al. Bone metastases affect prognosis but not effectiveness of third-line targeted therapies in patients with metastatic renal cell carcinoma. *Can Urol Assoc J* 2015; 9: 263-7.
9. Arranz Arijia J, Perez-Valderrama B, Rodriguez Sanchez A, Puertas Alvarez J, Pinto Marin A, Maximiano Alonso C, et al. SPAZO2 (SOGUG): Comparative effectiveness of everolimus (Ev) vs axitinib (Ax) as second-line after first-line pazopanib (1stPz) in metastatic renal carcinoma (mRC). *Annals of Oncology* 2017; 28 (Supplement 5): v313.
10. Vogelzang NJ, Pal SK, Signorovitch JE, Reichmann WM, Li N, Yang C, et al. Comparative effectiveness of everolimus and axitinib as second targeted therapies for metastatic renal cell carcinoma in the US: A retrospective chart review. *Current Medical Research and Opinion* 2016; 32: 741-7.
11. Wong MK, Yang H, Signorovitch JE, Wang X, Liu Z, Liu NS, et al. Comparative outcomes of everolimus, temsirolimus and sorafenib as second targeted therapies for metastatic renal cell carcinoma: A US medical record review. *Current Medical Research and Opinion* 2014; 30: 537-45.
12. Motzer RJ, Hutson TE, Ren M, Dutcus C, Larkin J. Independent assessment of lenvatinib plus everolimus in patients with metastatic renal cell carcinoma, 2016. Available from: <http://onlinelibrary.wiley.com/o/cochrane/clcentral/articles/453/CN-01168453/frame.html>. Date accessed.
13. Motzer RJ, Escudier B, Oudard S, Hutson TE, Porta C, Bracarda S, et al. Phase 3 trial of everolimus for metastatic renal cell carcinoma : final results and analysis of prognostic factors, 2010. Available from: <http://onlinelibrary.wiley.com/o/cochrane/clcentral/articles/159/CN-00762159/frame.html>. Date accessed.
14. Rini BI, Escudier B, Tomczak P, Kaprin A, Szczylik C, Hutson TE, et al. Comparative effectiveness of axitinib versus sorafenib in advanced renal cell carcinoma (AXIS): a randomised phase 3 trial, 2011. Available from: <http://onlinelibrary.wiley.com/o/cochrane/clcentral/articles/402/CN-00804402/frame.html>. Date accessed.
15. Motzer RJ, Hutson TE, Glen H, Michaelson MD, Molina A, Eisen T, et al. Lenvatinib, everolimus, and the combination in patients with metastatic renal cell carcinoma: a randomised, phase 2, open-label, multicentre trial. *Lancet Oncology* 2015; 16: 1473-82.

## SUPPLEMENTARY FILE

### Targeted therapies for previously treated advanced or metastatic renal cell carcinoma: systematic review and network meta-analysis

16. Cella D, Escudier B, Rini B, Chen C, Bhattacharyya H, Tarazi J, et al. Patient-reported outcomes for axitinib vs sorafenib in metastatic renal cell carcinoma: phase III (AXIS) trial. *British Journal of Cancer* 2013; 108: 1571-8.
17. Beaumont JL, Butt Z, Baladi J, Motzer RJ, Haas T, Hollaender N, et al. Patient-reported outcomes in a phase iii study of everolimus versus placebo in patients with metastatic carcinoma of the kidney that has progressed on vascular endothelial growth factor receptor tyrosine kinase inhibitor therapy, 2011. Available from: <http://onlinelibrary.wiley.com/doi/10.1002/1479-5598.2011.02511.x>
